# Supplementary material for: How honey bees make fast and accurate decisions
Source: eLife. 2023 Jun 27;12:e86176. doi: 10.7554/eLife.86176 (PMC10299826; doi:10.7554/eLife.86176)
Supplement: Figure 1—source data 1. — Tables show the number of bees’ correct and incorrect choices to the high and low rewarded stimuli during two different sequences of training trials were used (A: Protocol 1; B: Protocol 2). The blue cells indicate the number of reward bees received, whereas the red cells indicate the number of punishment bees received. [file elife-86176-fig1-data1.xlsx]

## Sheet: Sheet1
		1	1	2	3	4	5	6	7	8	9
1	S100%	8	3	5	10	5	7	5	4	7	6
	S0%	3	3	1	8	1	11	3	5	12	5
2	S50%	9	7	6	7	5	6	6	10	8	8
	S0%	2	3	6	8	3	6	3	10	3	4
3	S100%	9	8	7	4	4	7	6	8	6	10
	S33%	2	3	1	6	1	5	3	3	6	7
4	S66%	10	6	6	5	5	6	6	7	9	8
	S0%	7	5	6	11	6	2	4	4	5	4
5	S50%	10	5	7	6	4	7	6	7	9	10
	S33%	2	2	6	8	3	10	2	5	7	7
6	S33%	11	7	7	2	5	8	6	6	8	9
	S0%	5	3	2	0	3	6	2	5	7	6
7	S100%	11	7	7	6	4	7	6	5	8	8
	S50%	12	4	6	5	6	3	4	0	5	2
8	S66%	8	4	7	6	5	7	5	8	7	9
	S50%	5	3	7	8	5	8	3	2	2	3
9	S100%	11	6	9	5	5	7	6	7	10	8
	S0%	5	1	5	5	1	6	1	0	0	2
10	S100%	11	7	8	5	5	9	8	9	7	10
	S66%	3	3	4	5	1	11	6	7	10	5
11	S50%	12	4	8	3	4	7	6	6	6	9
	S0%	1	3	3	3	2	5	3	1	5	3
12	S100%	10	5	8	6	4	8	5	7	7	7
	S33%	1	1	1	3	1	6	1	3	5	4
13	S66%	9	5	7	5	3	6	8	7	5	8
	S0%	10	4	1	7	2	3	3	1	1	0
14	S50%	12	6	8	3	5	7	5	7	5	6
	S33%	3	4	5	4	2	4	5	5	3	0
15	S100%	11	5	8	7	6	7	6	6	8	8
	S50%	7	3	2	8	3	4	4	2	3	1
16	S33%	10	7	7	9	7	6	5	5	7	9
	S0%	12	5	5	7	10	4	1	2	1	1
17	S66%	12	6	6	6	5	6	8	8	9	7
	S50%	3	5	6	6	4	4	3	4	4	3
18	S100%	9	8	7	9	5	8	5	6	8	8
	S0%	3	0	1	4	4	5	2	1	1	1
		1	2	3	4	5	6	7	8	9	10
1	S50%	5	5	8	7	6	11	9	5	3	7
	S0%	10	4	2	4	0	3	13	12	5	9
2	S100%	5	4	8	8	8	11	9	6	8	7
	S66%	1	1	5	1	1	13	11	7	7	12
3	S100%	10	7	11	8	7	10	10	6	7	9
	S33%	7	1	4	3	5	5	6	4	5	7
4	S66%	8	7	7	7	15	12	9	7	7	11
	S0%	4	6	10	6	13	2	5	1	5	3
5	S100%	10	8	7	8	10	10	8	6	7	8
	S50%	10	4	5	4	3	0	2	0	2	2
6	S50%	8	11	8	7	8	10	8	7	9	8
	S33%	2	4	0	4	5	8	8	10	11	3
7	S100%	9	9	8	7	8	10	8	6	7	9
	S0%	1	0	0	0	0	1	2	2	4	1
8	S33%	8	8	13	7	8	11	9	6	8	10
	S0%	5	4	10	7	6	1	2	2	5	2
9	S66%	5	7	9	8	7	10	8	7	7	10
	S50%	2	5	9	3	5	6	6	2	3	2
10	S100%	8	8	9	8	8	10	7	7	9	11
	S0%	1	2	0	1	4	0	2	2	4	1
11	S50%	7	9	10	5	7	9	6	6	11	10
	S33%	5	4	6	4	6	9	11	9	20	18
12	S66%	8	10	9	8	13	10	7	7	8	10
	S50%	5	4	7	9	9	2	3	2	5	6
13	S33%	8	8	8	7	8	8	8	6	10	8
	S0%	4	2	9	3	6	2	1	2	8	7
14	S100%	9	11	12	6	9	13	7	6	9	9
	S50%	4	2	7	3	6	2	4	2	5	4
15	S66%	10	9	8	5	8	10	8	9	7	12
	S0%	5	2	8	3	3	0	2	1	2	4
16	S100%	9	9	9	8	10	12	8	6	7	9
	S33%	1	4	1	6	7	9	5	4	8	6
17	S100%	11	10	10	7	8	11	10	6	9	11
	S66%	3	4	2	1	6	11	4	3	12	6
18	S50%	9	10	9	9	7	12	6	8	9	9
	S0%	2	2	1	0	3	0	3	3	6	7
